# The prognostic value of long noncoding RNA HOTTIP on clinical outcomes in breast cancer

Yinlong Yang<sup>1,\*</sup>, Jinxian Qian<sup>1,\*</sup>, Youqun Xiang<sup>2</sup>, Yizuo Chen<sup>2</sup>, Jinmiao Qu<sup>2</sup>

<sup>1</sup>Department of Breast Surgery, Fudan University Shanghai Cancer Center, Department of Oncology, Shanghai Medical College, Fudan University, Shanghai 200000, People's Republic of China

<sup>2</sup>Department of Surgical Oncology, The First Affiliated Hospital of Wenzhou Medical University, Wenzhou 325000, Zhejiang, People's Republic of China

\*These authors have contributed equally to this work

Correspondence to: Yinlong Yang, *email*: lancetyang@126.com  
Jinmiao Qu, *email*: 281014887@qq.com

**Keywords:** long non-coding RNA, HOTTIP, prognosis, breast cancer

**Received:** October 31, 2016

**Accepted:** December 13, 2016

**Published:** December 27, 2016

## ABSTRACT

Although a few studies have assessed the prognostic value of long noncoding RNA HOTTIP in patients with malignant tumors, the relationship between HOTTIP and clinical outcome of breast cancer remains elusive. The aim of this study is to explore the prognostic significance of HOTTIP in breast cancer patients. A meta-analysis was performed to involve the eligible studies to investigate the association of HOTTIP expression level with outcome in cancer patients. Pooled hazard ratios (HRs) and 95% confidence interval (CI) of HOTTIP for cancer survival were calculated. Five relevant articles involving 460 patients with various solid carcinomas were included in this meta-analysis. For overall survival, high HOTTIP expression could significantly predict worse outcome with the pooled HR of 2.29 (95 % CI 1.72–3.03,  $P < 0.00001$ ). Furthermore, Gene Expression Omnibus was performed to evaluate the association of HOTTIP expression with the prognosis in breast cancer patients. It was also found an indication that high HOTTIP expression was associated with worse survival in breast cancer patients by microarray analysis (GSE20711, GSE16446 and GSE9195). Finally, association between HOTTIP levels and clinicopathological factors and prognosis was also analyzed in an independent validation cohort including 100 breast cancer cases. HOTTIP expression was correlated with tumor size ( $P=0.025$ ), lymph node status ( $P=0.009$ ) and TNM stage ( $P=0.0001$ ) in the breast cancer validation cohort. The Kaplan-Meier survival curves indicated that breast cancer patients with high HOTTIP expression had worse overall survival ( $P=0.0139$ ) and disease-free survival ( $P=0.0003$ ). Multivariate survival analysis based on the Cox proportional hazards model showed that HOTTIP is considered as an independent prognostic factor in breast cancer patients. Together, our combined results suggest that high HOTTIP expression may be serving as an unfavorable prognosis predictor for breast cancer patients.

## INTRODUCTION

Breast cancer (BC) is the most common cancer in women with 246,660 newly estimated diagnosed cases and 40,450 estimated deaths in the United States in 2016 [1]. Remarkable progresses have been made during recent decades. However, BC is a highly heterogeneous disease, which is diverse in its responsiveness to treatment [2, 3]. Thus, there has been increasing interest on identifying

novel prognostic biomarkers to predict its biological behavior. New biomarkers can also improve treatment design and contribute to the development of new therapeutic targets.

Long noncoding RNAs (lncRNAs) are defined as RNA molecules with more than 200 nucleotides in length not translated into protein. Once considered as transcriptional noise, lncRNAs have now been shown to be involved in genome packaging, chromatin organization,

dosage compensation, genomic imprinting and gene regulation [4]. Recently, emerging evidences have demonstrated the characterization of lncRNAs as a critical component in cancer biology [5, 6]. Abnormally expressed lncRNAs have either oncogenic or tumor suppressor functions during cancer initiation, development and progression [7]. Given that many lncRNAs are expressed in the way of tissue and cancer type restriction, specific lncRNAs are now likely to be translated into clinical applications for diagnosis, prognosis or predicting the response of treatment [8, 9]. The HOXA transcript at the distal tip (HOTTIP) lncRNA, located at the 5' end of the HOXA cluster, was recently functionally characterized [10]. Increased HOTTIP expression has been reported in tongue squamous cell carcinoma [11], lung cancer [12], pancreatic cancer [13], hepatocellular carcinoma [14], osteosarcoma [15], gastric cancer [16], glioma [17] and prostate cancer [18]. In these tumors, HOTTIP may serve as a potential oncogene and be an adverse prognostic factor in patients. However, little is known about the significance of HOTTIP expression and BC prognosis to date.

In this study, we performed a meta-analysis to investigate the relationship between HOTTIP expression and the survival in patients with various cancers. Additionally, Gene Expression Omnibus (GEO) dataset

were selected to disclose the association between the expressions of HOTTIP and BC prognosis. Furthermore, we conducted a validation set to verify the prognostic significance of HOTTIP in BC patients.

## RESULTS

### Meta-analysis and microarray analysis

A total of 23 studies using the above search strategy were retrieved. A flow diagram of the identification and selection of studies is shown in Figure 1. After evaluation, five studies including 460 patients were finally enrolled for further analysis [11, 14-16, 21]. The sample size ranged from 52 to 156 patients. For all studies, expression of HOTTIP was assessed by RT-PCR. These studies were all retrospective in design. Four studies evaluated patients from China, one evaluated patients from Switzerland. The types of cancers in these studies included hepatocellular cancer, tongue squamous cell carcinoma, colorectal cancer, osteosarcoma and gastric cancer. Table 1 presented the detailed parameters of the included studies. In the fixed effects model, meta-analysis of 5 studies on the prognostic value of HOTTIP expression indicated that higher expression level of HOTTIP significantly predicted worse overall survival (OS) in various solid carcinomas, with

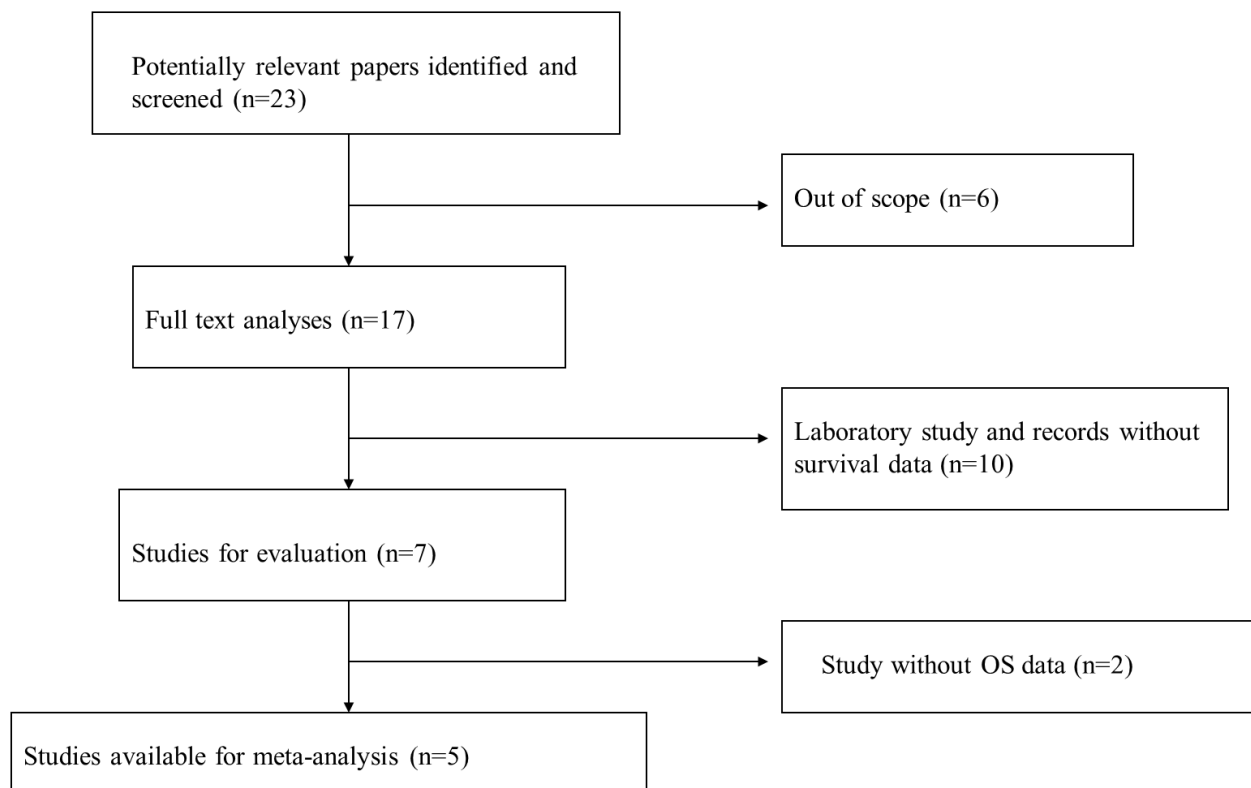

**Figure 1: Flow diagram of the identification and selection of studies.**

**Table 1: Characteristics of the all included studies in the meta-analysis**

| Study     | Year | Country     | Cancer type                    | Number | Sample | Cut-off | Method  | Outcome | Follow-up (months) |
|-----------|------|-------------|--------------------------------|--------|--------|---------|---------|---------|--------------------|
| Quagliata | 2014 | Switzerland | Hepatocellular cancer          | 52     | Tissue | ROC     | qRT-PCR | OS      | ≥60                |
| Zhang     | 2014 | China       | Tongue squamous cell carcinoma | 86     | Tissue | Median  | qRT-PCR | OS      | 38(range,23–60)    |
| Ren       | 2015 | China       | Colorectal cancer              | 156    | Tissue | Median  | qRT-PCR | OS      | 46(range,33-65)    |
| Li        | 2015 | China       | Osteosarcoma                   | 68     | Tissue | Median  | qRT-PCR | OS      | ≥60                |
| Ye        | 2016 | China       | Gastric cancer                 | 98     | Tissue | Median  | qRT-PCR | OS      | ≥60                |

ROC, receiver operating characteristic; qRT-PCR, quantitative real-time polymerase chain reaction; OS, overall survival.

the pooled HR of 2.29 (95 % CI 1.72–3.03,  $P < 0.00001$ ; Figure 2). Finally, funnel plot and Egger’s test were used to evaluate the publication bias of the included studies. The shape of the funnel plot did not reveal any evidence of obvious asymmetry (Figure 3).

Given that meta-analysis identified that aberrant overexpression of HOTTIP is associated with unfavorable survival in patients with various solid cancer. There is no available report on the relationship between HOTTIP and BC. Hence, we performed Gene Expression Omnibus (GEO) dataset parameters to disclose the association between the expression of HOTTIP and prognosis of BC. Three microarray datasets (GSE20711, GSE16446, GSE9195) which included BC patients were collected from the GEO. It demonstrated that BC patients with high HOTTIP expression had worse OS (GSE20711, GSE16446) and relapse free survival (GSE9195) (Figure 4).

### Correlations between HOTTIP expression and clinical characteristics in BC patients

To further validate whether the *HOTTIP* could predict the prognosis in BC patients, we conducted an independent validation set including 100 BC cases by the method of qRT-PCR. BC tissue samples were classified into low-expression group ( $n=50$ ) and high-expression group ( $n=50$ ), according to the median expression level of all BC samples. The association between HOTTIP expression levels and clinicopathological characteristics in patients with BC was showed in Table 2. Overall, high HOTTIP expression levels were positively correlated with tumor size, lymph node status and TNM stage ( $P=0.025$ ,  $0.009$ ,  $0.0001$ , respectively). However, HOTTIP expression in BC was not associated with other parameters such as age ( $p=0.161$ ), menopausal status ( $p=0.728$ ), grade ( $p=0.685$ ), ER status ( $p=0.161$ ), PR status ( $p=0.422$ ), Her-

2 status ( $p=0.135$ ) (Table 2). These data imply that up-regulated HOTTIP correlates with BC progression.

### Association between HOTTIP expression and BC patient survival

In order to assess the prognostic value of HOTTIP expression for BC, we analyzed the prognostic value of HOTTIP expression levels in 100 BC patients using Kaplan–Meier analysis and the log-rank test. As shown in Figure 5, patients with high HOTTIP expression had worse disease-free survival (DFS) than those with low HOTTIP expression ( $P = 0.0003$ ; Figure 5A). More importantly, the high HOTTIP expression group had shorter OS than the low expression group ( $P = 0.0139$ ; Figure 5B). Moreover, univariate analysis of OS and DFS revealed that HOTTIP overexpression was an unfavorable prognostic factor in BC patients (OS,  $P=0.002$ ; DFS,  $P<0.001$ ; Table 3, 4), regardless of other clinicopathological features, such as tumor size, lymph node metastasis, TNM stage, Her-2 status. Finally, Multivariate survival analysis based on the Cox proportional hazards model showed that high HOTTIP expression had an HR of 7.121 for the OS (95% CI=1.176–43.109,  $P=0.033$ ) and an HR of 4.083 for the DFS (95% CI=1.133–14.713,  $P=0.03$ ). By comparison, TNM stage had an HR of 2.729 (95% CI 1.103–6.755,  $P=0.030$ ) for the OS and an HR of 2.555 for the DFS (95% CI 1.219–5.353,  $P=0.013$ ) (Table 3, 4). Thus, HOTTIP expression was an independent prognostic indicator for survival in BC patients.

## DISCUSSION

As far as it is concerned, our study is the first report data for the HOTTIP expression and prognosis in patients with BC. In this two-phase study, we systematically investigate the relationship between HOTTIP expression

and the survival in patients with various cancers by a meta-analysis. Then, we analyzed the association between the HOTTIP expression and prognosis of BC in three GEO cohorts with BC patients. In the second phase, we evaluated the clinical significance of HOTTIP as a prognostic biomarker for BC patients by using a validation study. We found that HOTTIP expression is associated with the clinicopathological features and prognosis of BC. Thus, HOTTIP can function as a biomarker for malignancy and monitoring prognosis in BC clinically.

Emerging evidence suggests that lncRNAs constitute critical part of tumor biology. Abnormal expression of lncRNAs in cancer marks the spectrum of cancer progression and may serve as an predictor for prognosis in patients with cancer [9, 22, 23]. Rinn et al. have identified 231 non-coding RNAs associated with human HOX gene loci and these RNAs are spatially expressed and sequence-specific [6]. As the first HOX-associated lncRNA that was characterized, HOTAIR was initially identified as a scaffold RNA which was

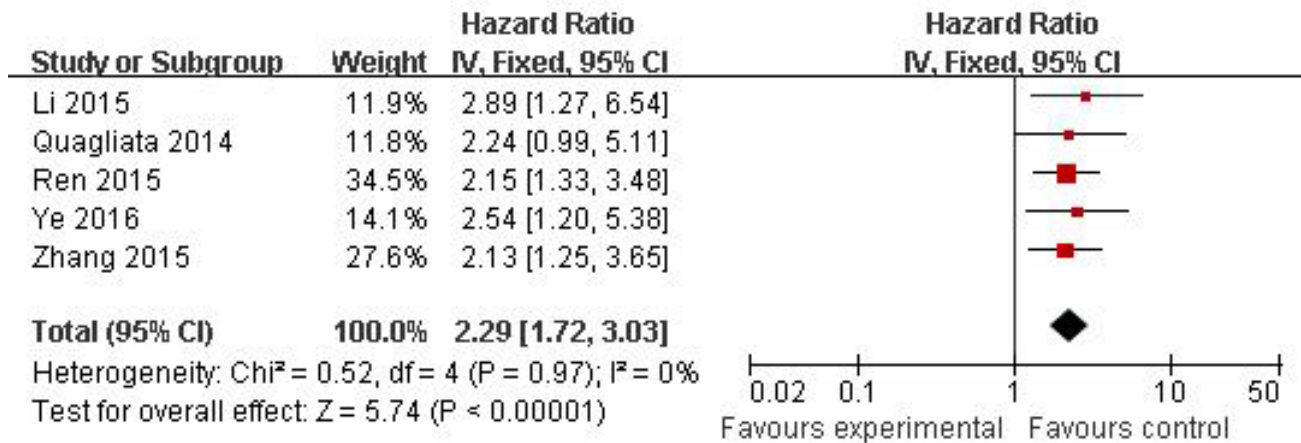

Figure 2: Forest plots of studies evaluating hazard ratios of overall survival comparing high and low HOTTIP expression among patients with solid cancer.

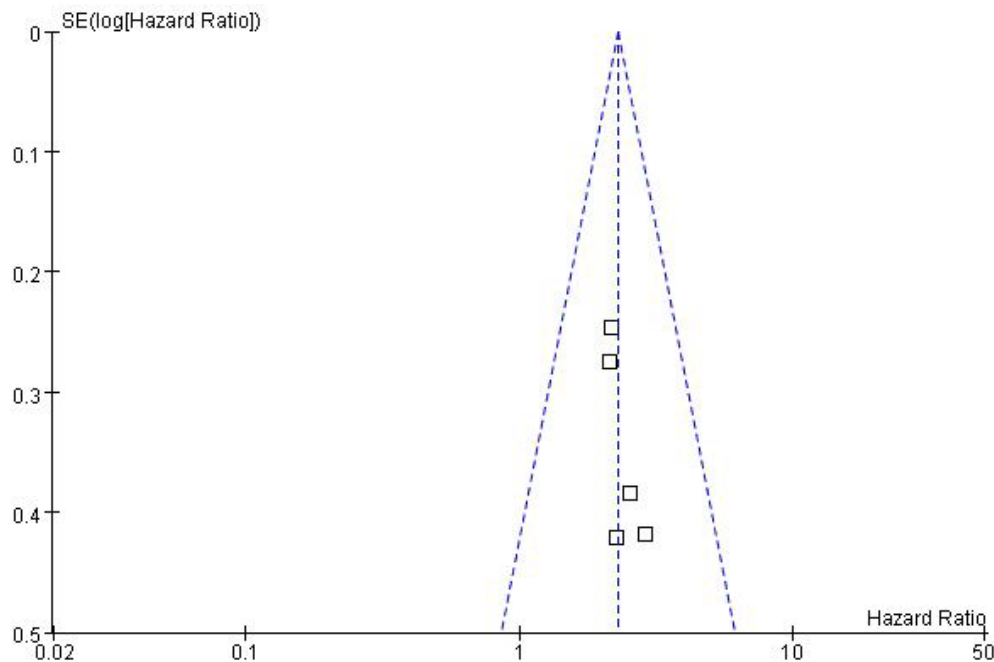

Figure 3: Funnel plot for identifying publication bias in the association between HOTTIP expression and overall survival of patients with solid tumors.

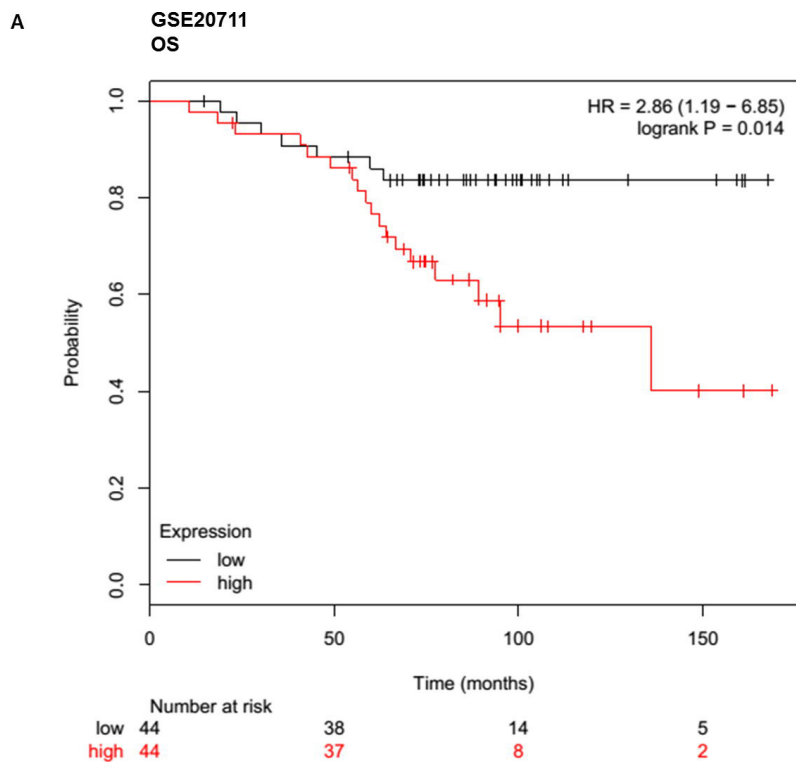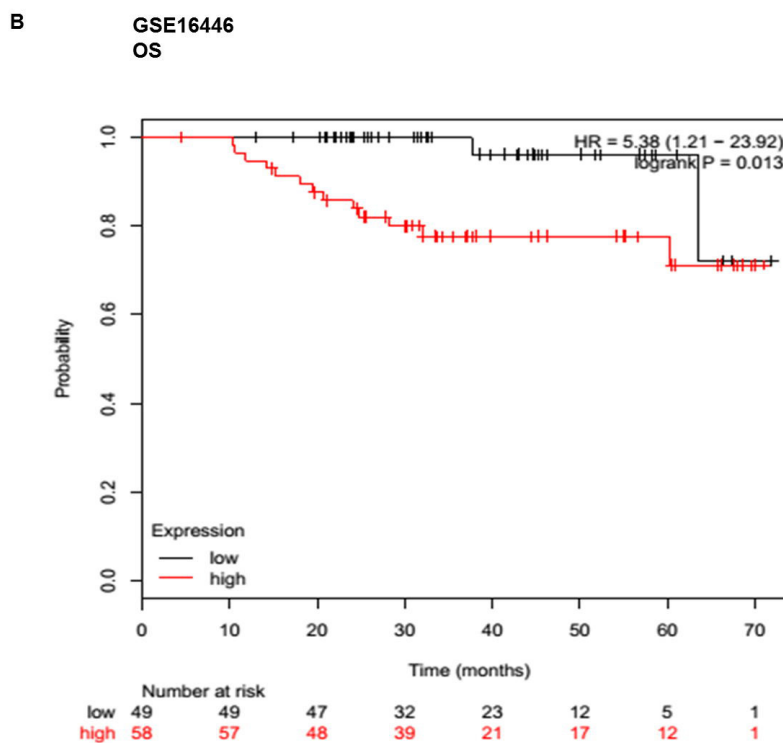

**Figure 4: Up-regulated HOTTIP was associated with poor prognosis in breast cancer.** Overall survival (OS) and relapse free survival (RFS) analysis of patients with low and high HOTTIP expression using a Kaplan-Meier curve in the GSE20711 **A**, GSE16446 **B**, and GSE9195.

(Continued)

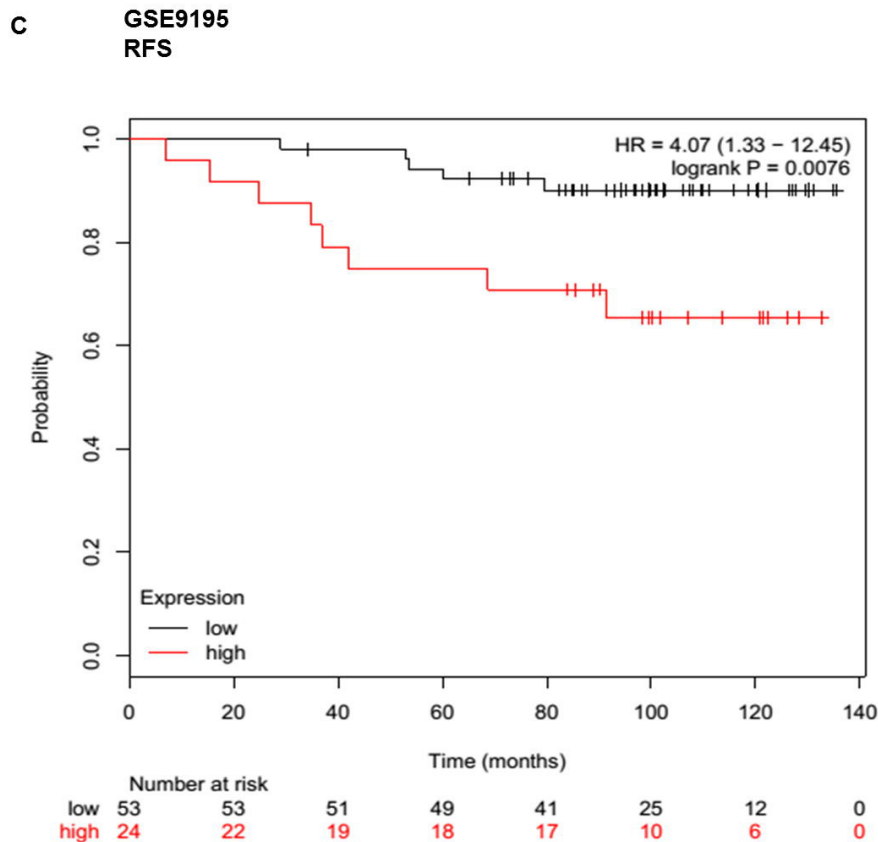

**Figure 4 (Continued):** C. datasets. HR: hazard ratio.

associated with the chromatin-modifying PRC2 complex and the H3K27me3 histone mark, the latter of which is related to gene suppression. Subsequent studies showed that HOTAIR directly interacted with both the PRC2 and LSD1/REST/CoREST repressor complexes [6, 7, 24]. HOTAIR overexpression has been demonstrated in primary breast tumors and metastases. Its overexpression has been shown to alter gene expression pattern of breast epithelial cells to a pattern similar to embryonic and neonatal fibroblasts, whereas its down-regulation has changed pattern of H3K27 methylation and decreased invasiveness [7]. Another study has shown that its expression may be an independent biomarker for the prediction of metastasis risk in ER positive BC patients [25]. In addition, its transcription has been shown to be induced by estrogen whereas inhibited by tamoxifen [26]. A recent study indicated its significant overexpression in the HER2-enriched subtype BC [27]. The oncogene functions and unfavorable prognostic significance of HOTAIR have been reported in multiple cancers including BC, whereas the expression and functions of other HOX-associated lncRNAs in cancer cell lines have not been extensively studied.

Recently, HOTTIP has drawn increasing attention among cancer-related lncRNAs, which have been

demonstrated to regulate genes by various mechanisms including epigenetic modifications, lncRNA-miRNA and lncRNA-protein interactions [10, 28, 29]. It has been confirmed that HOTTIP could directly interact with the Trithorax protein WDR5 inducing an open DNA-chromatin configuration to target WDR5/MLL complexes driving histone H3 lysine 4 trimethylation and thus regulating the transcription of 5' end HOXA locus genes [10]. Interestingly, recent studies also found that there is a positive correlation between the expression of HOTTIP and HOX genes in tumors and normal tissue [14, 30–33]. It has demonstrated that HOTTIP was involved in the cancer progression. For example, Tsang et al. reported that knockdown of HOTTIP attenuated hepatocellular carcinoma cell proliferation *in vitro* and markedly abrogated tumorigenicity *in vivo*. Furthermore, knockdown of HOTTIP also inhibited cancer cells migration and significantly abrogated lung metastasis in mouse xenograft mode [34]. A similar trend was seen in our study. We also found that the expression of HOTTIP was positively correlated with tumor size, lymph node metastasis and clinical stage in BC. Furthermore, univariate analysis and multivariate analysis indicated that HOTTIP could be an independent prognostic factor and overexpression of HOTTIP was correlated with



**Table 2: Correlation between HOTTIP expression and clinicopathological features in patients with breast cancer**

| Variables         | HOTTIP expression |                | P value |
|-------------------|-------------------|----------------|---------|
|                   | Low<br>(n=50)     | High<br>(n=50) |         |
| Age               |                   |                | 0.161   |
| ≤50               | 23                | 30             |         |
| >50               | 27                | 20             |         |
| Menopausal status |                   |                | 0.728   |
| Premenopausal     | 25                | 32             |         |
| Postmenopausal    | 25                | 28             |         |
| Tumor size        |                   |                | 0.025*  |
| ≤2cm              | 26                | 15             |         |
| >2cm              | 24                | 35             |         |
| Lymph node status |                   |                | 0.009*  |
| Negative          | 31                | 18             |         |
| Positive          | 19                | 32             |         |
| Grade             |                   |                | 0.685   |
| I-II              | 20                | 22             |         |
| III               | 30                | 28             |         |
| ER status         |                   |                | 0.161   |
| Negative          | 21                | 28             |         |
| Positive          | 29                | 22             |         |
| PR                |                   |                | 0.422   |
| Negative          | 25                | 29             |         |
| Positive          | 25                | 21             |         |
| HER-2/neu status  |                   |                | 0.135   |
| Negative          | 30                | 25             |         |
| Positive          | 20                | 25             |         |
| Clinical stage    |                   |                | 0.0001* |
| I-II              | 42                | 24             |         |
| III               | 8                 | 26             |         |

unfavorable survival in BC patients. Taken together, our data revealed that HOTTIP was implicated in the progress of BC and it might act as a tumor oncogene. To the best of our knowledge, it was the first report about the association of HOTTIP with the progression and prognosis of BC. However, our study still has several limitations. For one thing, it is a retrospective study, conducted on a small sample. For another, *in vitro* and *in vivo* experiments are needed to be conducted to further validate the biological

effects of HOTTIP on breast cancer. The underlying mechanisms also remain unknown and deserve further research.

In summary, our findings indicate that HOTTIP expression level has the potential to be an independent unfavorable prognostic indicator for BC patients. The results of this study indicated that HOTTIP may be a novel prognostic marker and a potential new target for BC therapy.

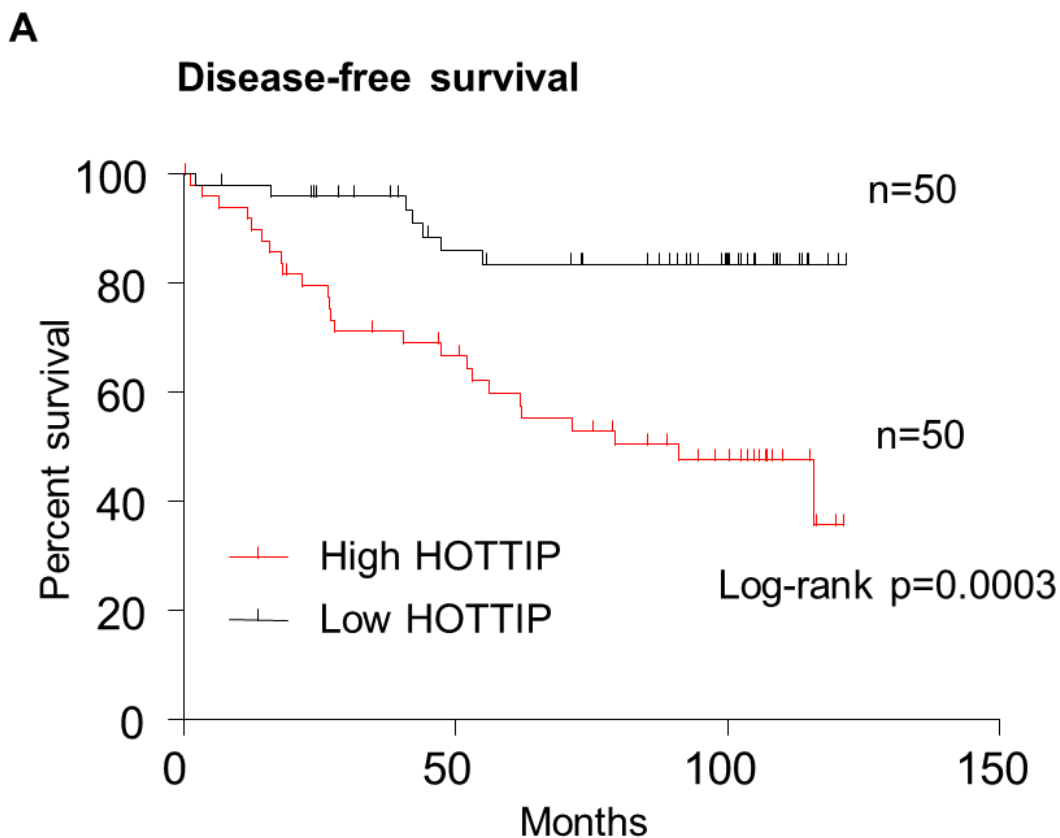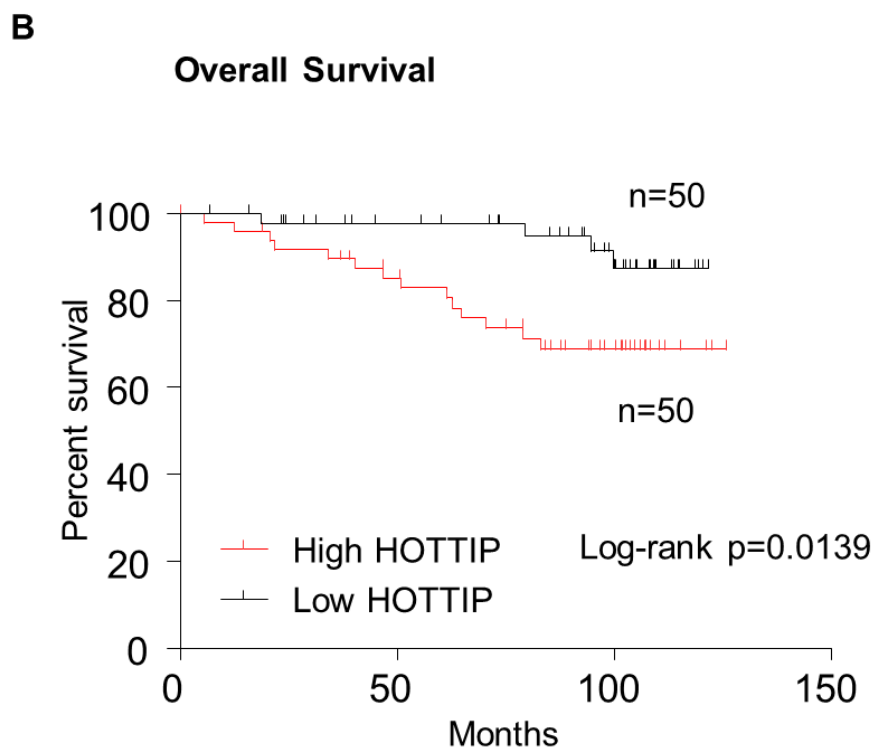

**Figure 5: Kaplan–Meier survival curves were stratified by HOTTIP expression level in breast cancer patients.** Patients in high HOTTIP group showed decreased disease-free survival (DFS, **A**) and overall survival (OS, **B**), as compared with low HOTTIP group,  $p = 0.0003$  and  $p = 0.0139$ , respectively. The  $p$  value was calculated using the log-rank test.



**Table 3: Univariate and multivariate Cox regression analyses of overall survival in breast cancer patients**

| Variables                                              | Univariate analysis  |         | Multivariate analysis |         |
|--------------------------------------------------------|----------------------|---------|-----------------------|---------|
|                                                        | HR(95%CI)            | P value | HR(95%CI)             | P value |
| Age(years), $\leq 50$ versus $>50$                     | 1.245(0.446-3.502)   | 0.671   |                       |         |
| Menopausal status, Premenopausal versus Postmenopausal | 1.462(0.520-4.112)   | 0.472   |                       |         |
| Tumor size(cm), $\leq 2$ versus $>2$                   | 2.411(0.856-6.791)   | 0.096   |                       |         |
| Lymph node status, negative versus positive            | 3.671(1.196-11.262)  | 0.023   | 0.821(0.147-4.587)    | 0.822   |
| Grade I-II versus III                                  | 1.973(0.674-5.770)   | 0.215   |                       |         |
| ER status, negative versus positive                    | 0.247(0.075-0.814)   | 0.022   | 0.408(0.052-3.194)    | 0.393   |
| RR status, negative versus positive                    | 0.190(0.051-0.708)   | 0.013   | 0.206(0.024-1.738)    | 0.147   |
| HER-2/neu status, negative versus positive             | 5.156(1.754-15.157)  | 0.003   | 1.665(0.427-6.941)    | 0.462   |
| TNM stage, I-II versus III                             | 2.996(1.697-5.290)   | 0.000   | 2.729(1.103-6.755)    | 0.030   |
| HOTTIP expression, low versus high                     | 11.294(2.435-52.397) | 0.002   | 7.121(1.176-43.109)   | 0.033   |

**Table 4: Univariate and multivariate Cox regression analyses of disease-free survival in breast cancer patients**

| Variables                                              | Univariate analysis |         | Multivariate analysis |         |
|--------------------------------------------------------|---------------------|---------|-----------------------|---------|
|                                                        | HR(95%CI)           | P value | HR(95%CI)             | P value |
| Age(years), $\leq 50$ versus $>50$                     | 1.123(0.475-2.660)  | 0.791   |                       |         |
| Menopausal status, Premenopausal versus Postmenopausal | 2.003(0.841-4.769)  | 0.117   |                       |         |
| Tumor size(cm), $\leq 2$ versus $>2$                   | 2.776(1.159-6.649)  | 0.022   | 1.849(0.555-6.162)    | 0.317   |
| Lymph node status, negative versus positive            | 3.473(1.417-8.515)  | 0.007   | 0.772(0.184-3.238)    | 0.723   |
| Grade I-II versus III                                  | 2.837(1.127-7.146)  | 0.027   | 1.188(0.328-4.296)    | 0.793   |
| ER status, negative versus positive                    | 0.579(0.244-1.373)  | 0.215   |                       |         |
| PR status, negative versus positive                    | 0.463(0.190-1.125)  | 0.089   |                       |         |
| HER-2/neu status, negative versus positive             | 4.943(1.903-12.843) | 0.001   | 2.848(0.802-10.119)   | 0.106   |
| TNM stage, I-II versus III                             | 3.786(2.095-6.844)  | 0.000   | 2.555(1.219-5.353)    | 0.013   |
| HOTTIP expression, low versus high                     | 9.750(3.319-28.645) | 0.000   | 4.083(1.133-14.713)   | 0.03    |

## MATERIALS AND METHODS

### Meta-analysis search strategy

We performed meta-analysis according to the guidelines of the Meta-analysis of Observational Studies in Epidemiology group (MOOSE) [19]. We searched online PubMed, EMBASE and ISI Web of Science from January 1st, 2011 to October 1st, 2016 to identify relevant studies. Two sets of key words were used among that process, namely “HOTTIP and cancer”. A manual

review of the references of relevant publications was also performed to obtain more studies.

### Inclusion and exclusion criteria

Eligible studies included in this meta-analysis met the following criteria: (I) they studied the patients with any type of cancer; (II) they measured the expression of HOTTIP; and (III) they investigated the association between HOTTIP expression levels and cancer survival outcome. Articles were excluded on the basis of the following criteria: (I) review articles or letters, (II) non-

English articles, (III) animal or laboratory studies. (IV) studies of nondichotomous HOTTIP expression levels, (V) absence of key information about survival outcome such as hazard ratio (HR), 95% CI and P value. When a study reporting the same patient cohort was included in several publications, only the most latest or complete study was selected. If any doubt of suitability remained after the abstract was examined, the complete manuscript was obtained.

### Quality assessment

Two authors critically assessed the quality of all the studies included according to a basic standard as follows: I) clear report of study population and origin of country, II) clear definition of study design, III) clear definition of type of carcinoma, IV) clear definition of outcome assessment, V) clear definition of measurement of HOTTIP, and VI) sufficient follow-up time. Otherwise, the study was removed in order to enhance the quality of the meta-analysis.

### Data extraction

Two reviewers independently extracted the required information from all eligible studies to rule out any discrepancy. The following data were extracted: first author, year of publication, country of origin, sample size, tumor type, method of testing HOTTIP and the cut-off, follow-up, HR of HOTTIP for overall survival (OS) as well as corresponding 95 % confidential interval (CI) and P value. Multivariate Cox hazard regression analysis was used in the present analysis. When HR data were not available but appropriate summary statistics or Kaplan-Meier curves were provided, we calculated HR using the described method [20]. Disagreements were resolved by discussion. All the data were subject to consensus.

### Patients and tissue samples

The 100 cases of clinical specimens were collected from the First Affiliated Hospital of Wenzhou Medical University, between June 2006 and June 2009. All the patients analyzed in this study underwent resection of primary BC. All the cases were histopathologically confirmed as invasive ductal adenocarcinoma. All the resected tissue samples were immediately frozen in liquid nitrogen and stored at  $-80^{\circ}\text{C}$  until RNA extraction. The clinical and pathological characteristics of each patient were also collected. All patients completed the follow-up, until 30 July 2016. Overall survival (OS) was defined as the interval between the dates of surgery and death. Disease free survival (DFS) was defined as the interval between the dates of surgery and disease recurrence and distant metastasis. All patients gave written informed

consent for the collection of biomaterials. Approval for this study was received from the Ethics Committee of the host institution.

### RNA extraction and quantitative real-time PCR analysis

Total RNA was extracted using TRIzol reagent (Invitrogen). After converting total RNA to cDNA in a reverse transcription (RT) reaction, qPCR were used to quantitate the mRNA expression levels. To detect HOTTIP expression, we used the SYBR Green method. The following primers were used in this study: HOTTIP were 5'-GTGGGGCCCAGACCCGC-3' (forward) and 5'-AATGATAGGGACACATCGGGGA-3' (reverse). Beta-actin, 5'-TCCTCTCCCAAGTCCACACA-3' (forward) and 5'-GCACGAAGGCTCATCATTCA-3' (reverse). The relative expression of HOTTIP was calculated and normalized using the delta-delta CT ( $2^{-\Delta\Delta\text{CT}}$ ) method relative to Beta-actin. Independent experiments were done in triplicate.

### Statistical analysis

All these HRs and 95% CI were calculated following Tierney's method and the logHR and standard error (logHR) were used for aggregation of the survival results. Generally, an observed HR of  $>1$  implied worse survival for the group with HOTTIP overexpression. This impact of high expression of HOTTIP on the survival rate was considered statistically significant if the 95% CI for the overall HR did not overlap in the forest plot. A test of heterogeneity of combined HRs was carried out using Cochran's Q test and Higgins I-squared statistic. Heterogeneity was defined as  $p < 0.10$  or  $I^2 > 50\%$ . Pooled HR was calculated using a fixed effect model or random effect model to evaluate the relationship between HOTTIP expression and overall survival. When homogeneity was fine ( $p > 0.10$ ,  $I^2 < 50\%$ ), a fixed effect model was used for secondary analysis. If not, a random effect model was used. Publication bias was evaluated using the funnel plot and Egger's test,  $P > 0.05$  was considered indicative of a lack of publication bias.

Using the Kaplan-Meier method, OS and DFS curves were made, and the log-rank test was applied for comparison. The significance of between-group differences was estimated using Student's t-test,  $\chi^2$  test or Wilcoxon test, as appropriate. Variables with a value of  $P < 0.05$  in univariate analysis were used in a subsequent multivariate analysis, based on the Cox proportional hazards model. All P values were two-sided, and all analyses were performed using the Stata software (StataCorp, College Station, TX, USA) and Review Manager (v5.0; Oxford, United Kingdom).

## ACKNOWLEDGMENTS

This study was supported in part by a grant from Natural Science Foundations of Zhejiang Province (NO. LY17H160053).

## CONFLICTS OF INTEREST

The authors declare that there is no conflicts of interest in this work.

## REFERENCES

1. Siegel RL, Miller KD, Jemal A. Cancer statistics, 2016. *CA Cancer J Clin.* 2016; 66: 7-30.
2. Comprehensive molecular portraits of human breast tumours. *Nature.* 2012; 490: 61-70.
3. Ciriello G, Gatza ML, Beck AH, Wilkerson MD, Rhie SK, Pastore A, Zhang H, McLellan M, Yau C, Kandoth C, Bowlby R, Shen H, Hayat S, et al. Comprehensive Molecular Portraits of Invasive Lobular Breast Cancer. *Cell.* 2015; 163: 506-19.
4. Gutschner T, Diederichs S. The hallmarks of cancer: a long non-coding RNA point of view. *RNA Biol.* 2012; 9: 703-19.
5. Maruyama R, Shipitsin M, Choudhury S, Wu Z, Protopopov A, Yao J, Lo PK, Bessarabova M, Ishkin A, Nikolsky Y, Liu XS, Sukumar S, Polyak K. Altered antisense-to-sense transcript ratios in breast cancer. *Proc Natl Acad Sci U S A.* 2012; 109: 2820-4.
6. Rinn JL, Kertesz M, Wang JK, Squazzo SL, Xu X, Bruggmann SA, Goodnough LH, Helms JA, Farnham PJ, Segal E, Chang HY. Functional demarcation of active and silent chromatin domains in human HOX loci by noncoding RNAs. *Cell.* 2007; 129: 1311-23.
7. Gupta RA, Shah N, Wang KC, Kim J, Horlings HM, Wong DJ, Tsai MC, Hung T, Argani P, Rinn JL, Wang Y, Brzoska P, Kong B, et al. Long non-coding RNA HOTAIR reprograms chromatin state to promote cancer metastasis. *Nature.* 2010; 464: 1071-6.
8. Gibb EA, Brown CJ, Lam WL. The functional role of long non-coding RNA in human carcinomas. *Mol Cancer.* 2011; 10: 38.
9. Wapinski O, Chang HY. Long noncoding RNAs and human disease. *Trends Cell Biol.* 2011; 21: 354-61.
10. Wang KC, Yang YW, Liu B, Sanyal A, Corces-Zimmerman R, Chen Y, Lajoie BR, Protacio A, Flynn RA, Gupta RA, Wysocka J, Lei M, Dekker J, et al. A long noncoding RNA maintains active chromatin to coordinate homeotic gene expression. *Nature.* 2011; 472: 120-4.
11. Zhang H, Zhao L, Wang YX, Xi M, Liu SL, Luo LL. Long non-coding RNA HOTTIP is correlated with progression and prognosis in tongue squamous cell carcinoma. *Tumour Biol.* 2015; 36: 8805-9.
12. Deng HP, Chen L, Fan T, Zhang B, Xu Y, Geng Q. Long non-coding RNA HOTTIP promotes tumor growth and inhibits cell apoptosis in lung cancer. *Cell Mol Biol (Noisy-le-grand).* 2015; 61: 34-40.
13. Cheng Y, Jutooru I, Chadalapaka G, Corton JC, Safe S. The long non-coding RNA HOTTIP enhances pancreatic cancer cell proliferation, survival and migration. *Oncotarget.* 2015; 6: 10840-52. doi: 10.18632/oncotarget.3450.
14. Quagliata L, Matter MS, Piscuoglio S, Arabi L, Ruiz C, Procino A, Kovac M, Moretti F, Makowska Z, Boldanova T, Andersen JB, Hammerle M, Tornillo L, et al. Long noncoding RNA HOTTIP/HOXA13 expression is associated with disease progression and predicts outcome in hepatocellular carcinoma patients. *Hepatology.* 2014; 59: 911-23.
15. Li F, Cao L, Hang D, Wang F, Wang Q. Long non-coding RNA HOTTIP is up-regulated and associated with poor prognosis in patients with osteosarcoma. *Int J Clin Exp Pathol.* 2015; 8: 11414-20.
16. Ye H, Liu K, Qian K. Overexpression of long noncoding RNA HOTTIP promotes tumor invasion and predicts poor prognosis in gastric cancer. *Onco Targets Ther.* 2016; 9: 2081-8.
17. Xu LM, Chen L, Li F, Zhang R, Li ZY, Chen FF, Jiang XD. Over-expression of the long non-coding RNA HOTTIP inhibits glioma cell growth by BRE. *J Exp Clin Cancer Res.* 2016; 35: 162.
18. Zhang SR, Yang JK, Xie JK, Zhao LC. Long noncoding RNA HOTTIP contributes to the progression of prostate cancer by regulating HOXA13. *Cell Mol Biol (Noisy-le-grand).* 2016; 62: 84-8.
19. Stroup DF, Berlin JA, Morton SC, Olkin I, Williamson GD, Rennie D, Moher D, Becker BJ, Sipe TA, Thacker SB. Meta-analysis of observational studies in epidemiology: a proposal for reporting. Meta-analysis Of Observational Studies in Epidemiology (MOOSE) group. *JAMA.* 2000; 283: 2008-12.
20. Parmar MK, Torri V, Stewart L. Extracting summary statistics to perform meta-analyses of the published literature for survival endpoints. *Stat Med.* 1998; 17: 2815-34.
21. Ren YK, Xiao Y, Wan XB, Zhao YZ, Li J, Li Y, Han GS, Chen XB, Zou QY, Wang GC, Lu CM, Xu YC, Wang YC. Association of long non-coding RNA HOTTIP with progression and prognosis in colorectal cancer. *Int J Clin Exp Pathol.* 2015; 8: 11458-63.
22. Miao Z, Ding J, Chen B, Yang Y, Chen Y. HOTAIR overexpression correlated with worse survival in patients with solid tumors. *Minerva Med.* 2016; 107: 392-400.
23. Wang Y, Dang Y, Liu J, Ouyang X. The function of homeobox genes and lncRNAs in cancer. *Oncol Lett.* 2016; 12: 1635-41.
24. Tsai MC, Manor O, Wan Y, Mosammamaparast N, Wang JK, Lan F, Shi Y, Segal E, Chang HY. Long noncoding RNA

- as modular scaffold of histone modification complexes. *Science*. 2010; 329: 689-93.
25. Sorensen KP, Thomassen M, Tan Q, Bak M, Cold S, Burton M, Larsen MJ, Kruse TA. Long non-coding RNA HOTAIR is an independent prognostic marker of metastasis in estrogen receptor-positive primary breast cancer. *Breast Cancer Res Treat*. 2013; 142: 529-36.
  26. Bhan A, Hussain I, Ansari KI, Kasiri S, Bashyal A, Mandal SS. Antisense transcript long noncoding RNA (lncRNA) HOTAIR is transcriptionally induced by estradiol. *J Mol Biol*. 2013; 425: 3707-22.
  27. Su X, Malouf GG, Chen Y, Zhang J, Yao H, Valero V, Weinstein JN, Spano JP, Meric-Bernstam F, Khayat D, Esteva FJ. Comprehensive analysis of long non-coding RNAs in human breast cancer clinical subtypes. *Oncotarget*. 2014; 5: 9864-76. doi: 10.18632/oncotarget.2454.
  28. Lian Y, Cai Z, Gong H, Xue S, Wu D, Wang K. HOTTIP: a critical oncogenic long non-coding RNA in human cancers. *Mol Biosyst*. 2016; 12: 3247-53.
  29. Mohamadkhani A. Long Noncoding RNAs in Interaction With RNA Binding Proteins in Hepatocellular Carcinoma. *Hepat Mon*. 2014; 14: e18794.
  30. Chang S, Liu J, Guo S, He S, Qiu G, Lu J, Wang J, Fan L, Zhao W, Che X. HOTTIP and HOXA13 are oncogenes associated with gastric cancer progression. *Oncol Rep*. 2016; 35: 3577-85.
  31. Li Z, Zhao X, Zhou Y, Liu Y, Zhou Q, Ye H, Wang Y, Zeng J, Song Y, Gao W, Zheng S, Zhuang B, Chen H, et al. The long non-coding RNA HOTTIP promotes progression and gemcitabine resistance by regulating HOXA13 in pancreatic cancer. *J Transl Med*. 2015; 13: 84.
  32. Wang SS, Wuputra K, Liu CJ, Lin YC, Chen YT, Chai CY, Lin CS, Kuo KK, Tsai MH, Wang SW, Chen KK, Miyoshi H, Nakamura Y, et al. Oncogenic function of the homeobox A13-long noncoding RNA HOTTIP-insulin growth factor-binding protein 3 axis in human gastric cancer. *Oncotarget*. 2016; 7: 36049-64. doi: 10.18632/oncotarget.9102.
  33. Sang Y, Zhou F, Wang D, Bi X, Liu X, Hao Z, Li Q, Zhang W. Up-regulation of long non-coding HOTTIP functions as an oncogene by regulating HOXA13 in non-small cell lung cancer. *Am J Transl Res*. 2016; 8: 2022-32.
  34. Tsang FH, Au SL, Wei L, Fan DN, Lee JM, Wong CC, Ng IO, Wong CM. Long non-coding RNA HOTTIP is frequently up-regulated in hepatocellular carcinoma and is targeted by tumour suppressive miR-125b. *Liver Int*. 2015; 35: 1597-606.
